# Supplementary material for: Hybrid Nanomaterial of Graphene Oxide Quantum Dots with Multi-Walled Carbon Nanotubes for Simultaneous Voltammetric Determination of Four DNA Bases
Source: Nanomaterials (Basel). 2023 Apr 29;13(9):1509. doi: 10.3390/nano13091509 (PMC10180489; doi:10.3390/nano13091509)
Supplement: Supplementary file 1 [file nanomaterials-13-01509-s001.zip › nanomaterials-2341560-supplementary.pdf]

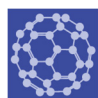

## Supplementary Information

# Hybrid Nanomaterial of Graphene Oxide Quantum Dots with Multi-Walled Carbon Nanotubes for Simultaneous Voltammetric Determination of Four DNA Bases

Qusai Hassan <sup>1,2,†</sup>, Chevon Riley <sup>1,†</sup>, Meissam Noroozifar <sup>1,\*</sup> and Kagan Kerman <sup>1,2,\*</sup>

<sup>1</sup> Department of Physical and Environmental Sciences, University of Toronto Scarborough, 1265 Military Trail, Toronto, ON M1C 1A4, Canada; qusai.hassan@mail.utoronto.ca (Q.H.); chevon.riley@mail.utoronto.ca (C.R.)

<sup>2</sup> Department of Chemistry, University of Toronto, 80 St. George Street, Toronto, ON M5S 3H6, Canada

\* Correspondence: m.noroozifar@utoronto.ca (M.N.), kagan.kerman@utoronto.ca (K.K.)

† These authors contributed equally to the work.

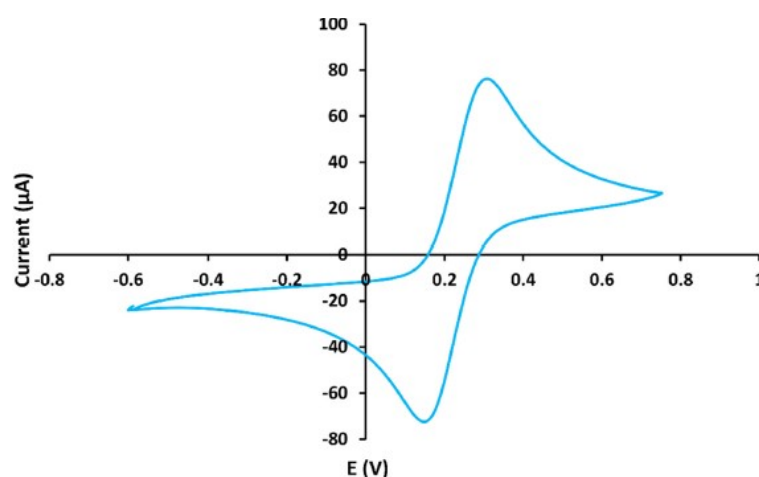

**Figure S1.** Cyclic voltammogram of a bare GCE in a solution of 5 mM of both  $K_3[Fe(CN)_6]$  and  $K_4[Fe(CN)_6]$  with 100 mM of KCl in 0.2 M PBS (pH 7.0). The formal potential was estimated as 0.23 V vs. Ag/AgCl (using  $E_f = (E_{anodic} + E_{cathodic})/2$ ), where  $E_{anodic} = 0.30$  V and  $E_{cathodic} = 0.15$  V.

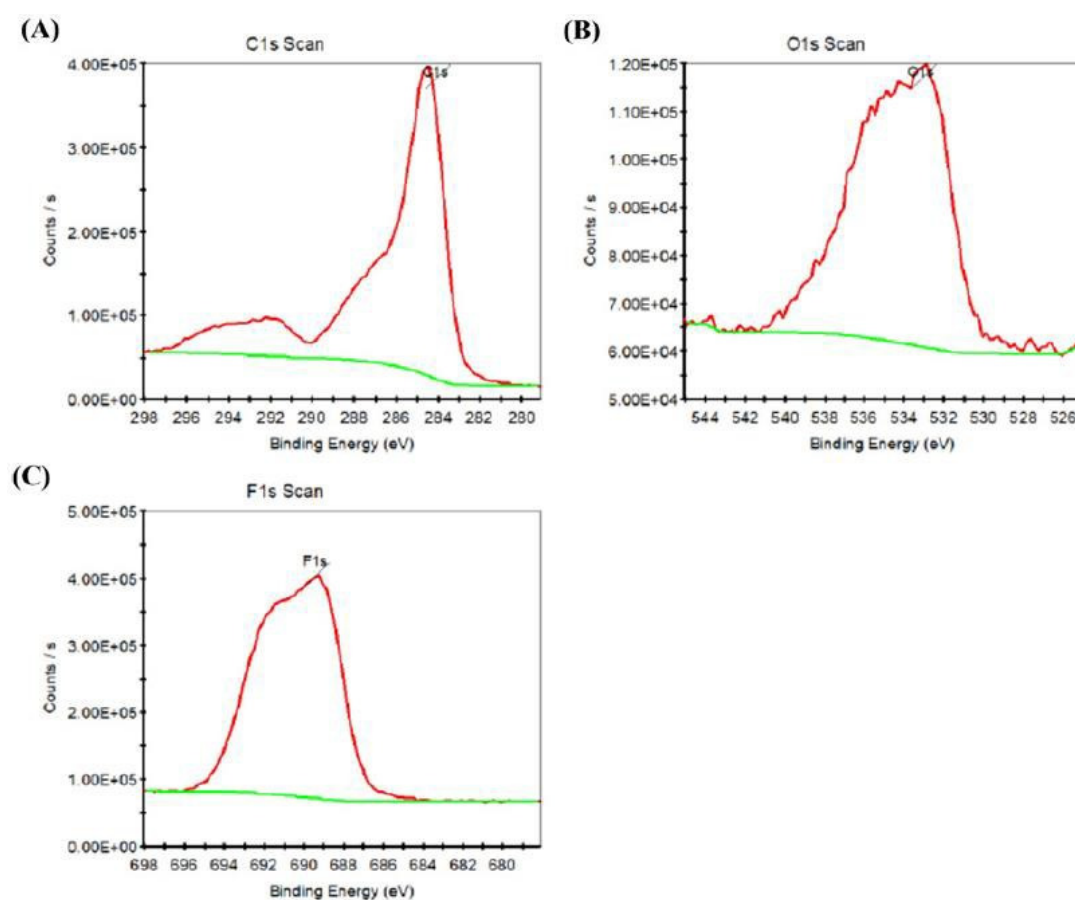

**Figure S2.** XPS spectra of (A) carbon, (B) oxygen, and (C) fluorine. The red spectra refer to the experimental acquisition while the green spectra refer to the background acquisition.

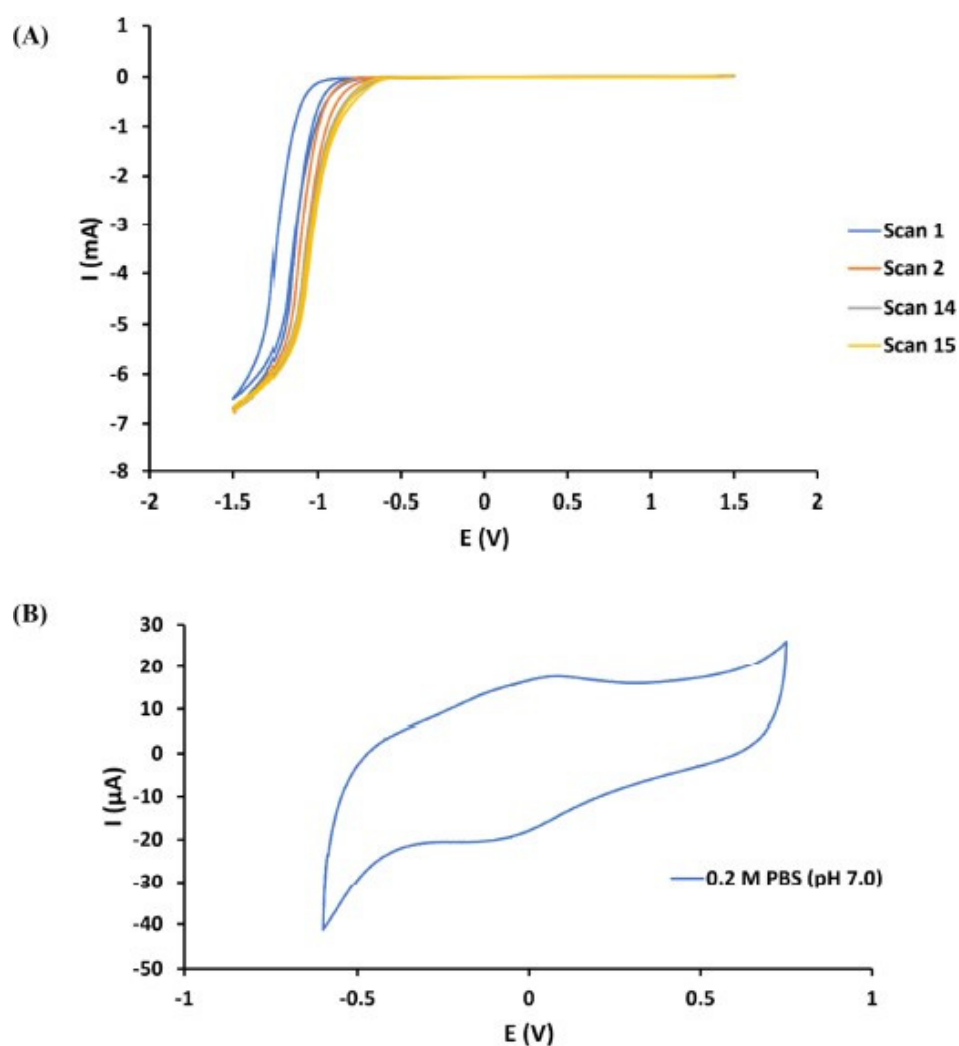

**Figure S3.** (A) Cyclic voltammograms showing the cleaning of the bare GCE in 1 M H<sub>2</sub>SO<sub>4</sub> at a scan rate of 100 mV/s. The first two and last two scans are shown. (B) Cyclic voltammogram of a bare GCE in 0.2 M PBS (pH 7.0) at a scan rate of 1 V/s. The electrode capacity values calculated for the oxidation and reduction peak were  $1.63 \times 10^{-7}$  C and  $2.33 \times 10^{-6}$  C, respectively.

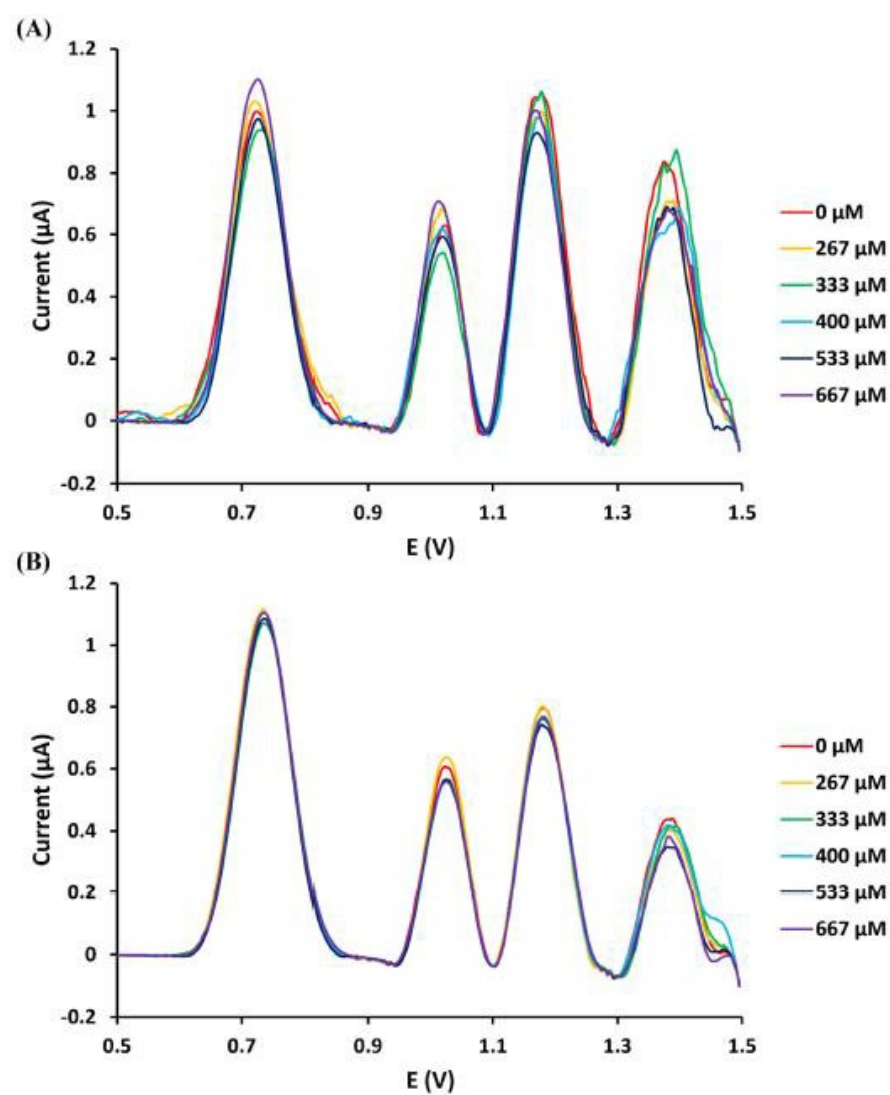

**Figure S4.** Interference study of G (40 μM), A (40 μM), T (400 μM), and C (400 μM) while varying the concentrations of (A) ascorbic acid and (B) glucose from 267 to 667 μM at GOQD-MWCNT/GCE in 0.2 M PBS (pH 7.0).
